# Supplementary material
Source: MDPI journal article supplement (https://www.mdpi.com/2504-2289/6/3/97)
Supplement: s1 [file s1]

This package contains a copy of the Electronic Appendix to “*Computational techniques enabling the perception of virtual images exclusive to the retinal afterimage*”.

This includes video examples; the image sequences that have been used in the experiment; the resulting dataset; and software implementing the approach, in source format.

All of the above are accessible by opening the file *index.html* in a standard web browser. Care has been taken to use standard web formats (namely HTML, JavaScript, and JPEG).

The source code can be executed, examined, and modified in the cross-platform *Max* programming environment (including the *Jitter* library). A free trial version of this environment can be downloaded at <http://www.cycling74.com>.
